# Supplementary material
Source: MDPI journal article supplement (https://www.mdpi.com/2312-7481/7/12/157)
Supplement: s1 [file s1]

Archive with 1 entries (1 files):
- magnetochemistry-1457659-supplementary.pdf
