# Supplementary material
Source: MDPI journal article supplement (https://www.mdpi.com/2312-7481/7/12/157)
Supplement: s1 [file s1 › magnetochemistry-1457659-supplementary.pdf]

## SUPPORTING INFORMATION ON

### Electrochemical, electro-catalytic and magnetic properties of vanadium-containing polyoxometalates

Joseph Dika Manga,<sup>a,b</sup> Anne-Lucie Teillout,<sup>a</sup> Eric Rivière,<sup>c</sup> Pedro de Oliveira,<sup>a</sup> Israël Martyr Mbomekallé\*<sup>a</sup>

<sup>a</sup> Institut de Chimie Physique, bâtiment 350, UMR 8000 CNRS, Université Paris-Saclay, Campus d'Orsay, 91405 Orsay Cedex, France

<sup>b</sup> Laboratoire de Chimie Analytique Structurale et des Matériaux, Département de Chimie, Faculté des Sciences de l'Université de Douala, BP 24157 Douala, Cameroun

<sup>c</sup> Institut de Chimie Moléculaire et des Matériaux d'Orsay, bâtiment 420, UMR 8182 CNRS, Université Paris-Saclay, Campus d'Orsay, 91405 Orsay Cedex, France

#### S1. Cyclic voltammetry characterisation at pH 3.0 (0.2M Na<sub>2</sub>SO<sub>4</sub> + H<sub>2</sub>SO<sub>4</sub>)

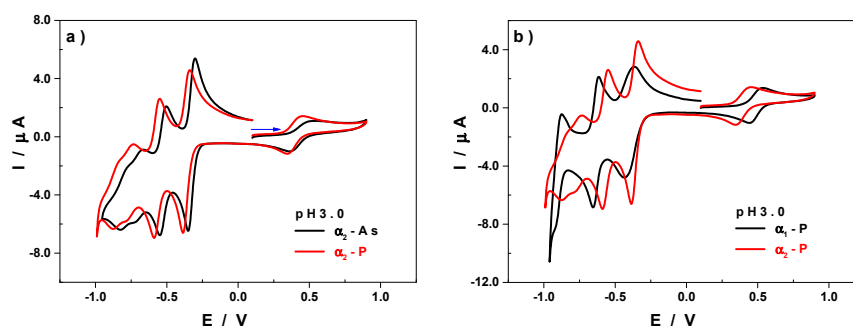

**Figure S1.** CVs of a)  $\alpha_2$ -As (black) and  $\alpha_2$ -P (red); b)  $\alpha_1$ -P (black) and  $\alpha_2$ -P (red) in 0.2M Na<sub>2</sub>SO<sub>4</sub> + H<sub>2</sub>SO<sub>4</sub> / pH3. Working electrode: GC; counter electrode: Pt; reference electrode: SCE. Scan rate: 10 mV s<sup>-1</sup>.

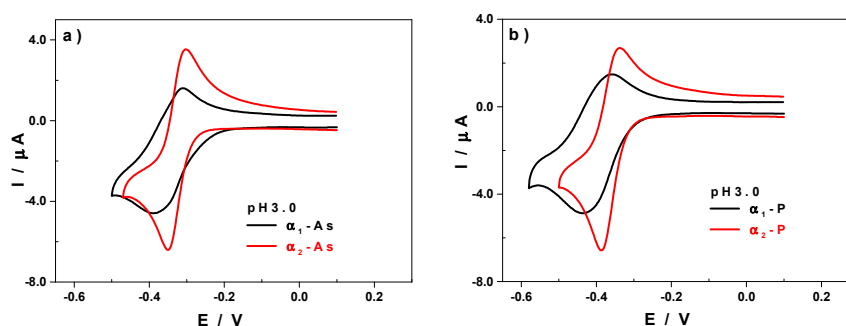

**Figure S2.** CVs of a)  $\alpha_1$ -As (black) and  $\alpha_2$ -As (red); b)  $\alpha_1$ -P (black) and  $\alpha_2$ -P (red) in 0.2M Na<sub>2</sub>SO<sub>4</sub> + H<sub>2</sub>SO<sub>4</sub> / pH3. Working electrode: GC; counter electrode: Pt; reference electrode: SCE. Scan rate: 10 mV s<sup>-1</sup>.

**S2. Cyclic voltammetry characterisation in three different media:** 0.2M Na<sub>2</sub>SO<sub>4</sub> + H<sub>2</sub>SO<sub>4</sub> / pH 3.0 (black), 0.4M CH<sub>3</sub>CO<sub>2</sub>Na + CH<sub>3</sub>CO<sub>2</sub>H / pH 5.0 (red) and 0.2M Na<sub>2</sub>HPO<sub>4</sub> + H<sub>3</sub>PO<sub>4</sub> / pH 7.0

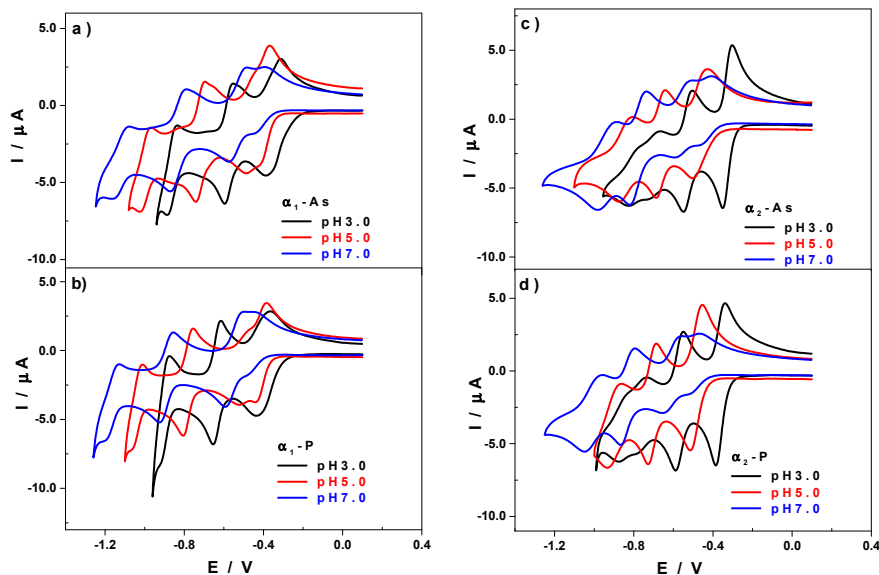

**Figure S3.** CVs of a)  $\alpha_1$ -As; b)  $\alpha_1$ -P; c)  $\alpha_2$ -As and d)  $\alpha_2$ -P in 0.2M Na<sub>2</sub>SO<sub>4</sub> + H<sub>2</sub>SO<sub>4</sub> / pH 3.0 (black), 0.4M CH<sub>3</sub>CO<sub>2</sub>Na + CH<sub>3</sub>CO<sub>2</sub>H / pH 5.0 (red) and 0.2M Na<sub>2</sub>HPO<sub>4</sub> + H<sub>3</sub>PO<sub>4</sub> / pH 7.0 (blue). Working electrode: GC; counter electrode: Pt; reference electrode: SCE. Scan rate: 10 mV s<sup>-1</sup>.

**Table S1.** Oxidation peak potentials ( $E_a$ ) and reduction peak potentials ( $E_c$ ) measured from CVs recorded in 0.4M CH<sub>3</sub>CO<sub>2</sub>Na + CH<sub>3</sub>CO<sub>2</sub>H / pH 5.0 (see above for the conditions).

|                        | V     | W <sub>1</sub> | W <sub>2</sub> | W <sub>3</sub> | W <sub>4</sub> |                                 |
|------------------------|-------|----------------|----------------|----------------|----------------|---------------------------------|
| $E_a$                  | 0.598 | -0.370         | -0.442         | -0.698         | -0.970         | <b><math>\alpha_1</math>-As</b> |
| $E_c$                  | 0.516 | -0.416         | -0.486         | -0.742         | -1.022         |                                 |
| $E_0' = (E_a + E_c)/2$ |       |                |                |                |                |                                 |
| # electrons            | 1     | 1              | 1              | 2              | 2              |                                 |
|                        | V     | W <sub>1</sub> | W <sub>2</sub> | W <sub>3</sub> | W <sub>4</sub> |                                 |
| $E_a$                  | 0.550 | -0.400         | -0.628         | -0.800         | -              | <b><math>\alpha_2</math>-As</b> |
| $E_c$                  | 0.372 | -0.514         | -0.700         | -0.884         | -              |                                 |
| $E_0' = (E_a + E_c)/2$ |       |                |                |                |                |                                 |
| # electrons            | 1     | 2              | 2              | 2              | -              |                                 |
|                        | V     | W <sub>1</sub> | W <sub>2</sub> | W <sub>3</sub> | W <sub>4</sub> |                                 |
| $E_a$                  | 0.546 | -0.384         | -0.470         | -0.756         | -0.1012        | <b><math>\alpha_1</math>-P</b>  |

|                        |       |                |                |                |                |                                |
|------------------------|-------|----------------|----------------|----------------|----------------|--------------------------------|
| $E_c$                  | 0.432 | -0.440         | -0.520         | -0.804         | -1.070         |                                |
| $E_0' = (E_a + E_c)/2$ |       |                |                |                |                |                                |
| # electrons            | 1     | 1              | 1              | 2              | 2              |                                |
|                        | V     | W <sub>1</sub> | W <sub>2</sub> | W <sub>3</sub> | W <sub>4</sub> |                                |
| $E_a$                  | 0.466 | -0.432         | -0.672         | -0.860         | -              |                                |
| $E_c$                  | 0.338 | -0.532         | -0.738         | -0.942         | -              | <b><math>\alpha_2</math>-P</b> |
| $E_0' = (E_a + E_c)/2$ |       |                |                |                |                |                                |
| # electrons            | 1     | 2              | 2              | 2              | -              |                                |

**Table S2.** Oxidation peak potentials ( $E_a$ ) and reduction peak potentials ( $E_c$ ) measured from CVs recorded in 0.2M Na<sub>2</sub>HPO<sub>4</sub> + H<sub>3</sub>PO<sub>4</sub> / pH 7.0 (see above for the conditions).

|                        |       |                |                |                |                |                                 |
|------------------------|-------|----------------|----------------|----------------|----------------|---------------------------------|
|                        | V     | W <sub>1</sub> | W <sub>2</sub> | W <sub>3</sub> | W <sub>4</sub> |                                 |
| $E_a$                  | 0.624 | -0.400         | -0.488         | -0.788         | -1.080         |                                 |
| $E_c$                  | 0.500 | -0.440         | -0.560         | -0.870         | -1.160         | <b><math>\alpha_1</math>-As</b> |
| $E_0' = (E_a + E_c)/2$ |       |                |                |                |                |                                 |
| # electrons            | 1     | 1              | 1              | 2              | 2              |                                 |
|                        | V     | W <sub>1</sub> | W <sub>2</sub> | W <sub>3</sub> | W <sub>4</sub> |                                 |
| $E_a$                  | 0.494 | -0.414         | -0.510         | -0.734         | -0.890         |                                 |
| $E_c$                  | 0.390 | -0.460         | -0.586         | -0.820         | -0.978         | <b><math>\alpha_2</math>-As</b> |
| $E_0' = (E_a + E_c)/2$ |       |                |                |                |                |                                 |
| # electrons            | 1     | 1              | 1              | 2              | 2              |                                 |
|                        | V     | W <sub>1</sub> | W <sub>2</sub> | W <sub>3</sub> | W <sub>4</sub> |                                 |
| $E_a$                  | 0.550 | -0.466         | -0.500         | -0.857         | -1.130         |                                 |
| $E_c$                  | 0.428 | -0.480         | -0.593         | -0.923         | -1.214         | <b><math>\alpha_1</math>-P</b>  |
| $E_0' = (E_a + E_c)/2$ |       |                |                |                |                |                                 |
| # electrons            | 1     | 1              | 1              | 2              | 2              |                                 |
|                        | V     | W <sub>1</sub> | W <sub>2</sub> | W <sub>3</sub> | W <sub>4</sub> |                                 |
| $E_a$                  | 0.450 | -0.466         | -0.570         | -0.800         | -0.968         |                                 |
| $E_c$                  | 0.388 | -0.530         | -0.648         | -0.860         | -1.044         | <b><math>\alpha_2</math>-P</b>  |
| $E_0' = (E_a + E_c)/2$ |       |                |                |                |                |                                 |
| # electrons            | 1     | 1              | 1              | 2              | 2              |                                 |

### S3. Preparation of the Britton-Robinson buffer solution

The Britton-Robinson buffer solution has a composition such that its pH varies linearly with the amount of hydroxide ions added to it.

In a 1 L calibrated flask, mix 12.5 mL of phosphoric acid 1.00 mol.L<sup>-1</sup>, 12,5 mL of acetic acid 1.00 mol.L<sup>-1</sup> and 125 mL of boric acid 0.1 mol.L<sup>-1</sup> (6,19 g.L<sup>-1</sup>) and add water up to 1L. The three components H<sub>3</sub>PO<sub>4</sub>, CH<sub>3</sub>CO<sub>2</sub>H and H<sub>3</sub>BO<sub>3</sub> are all at a concentration of 1.25.10<sup>-2</sup> mol.L<sup>-1</sup>.

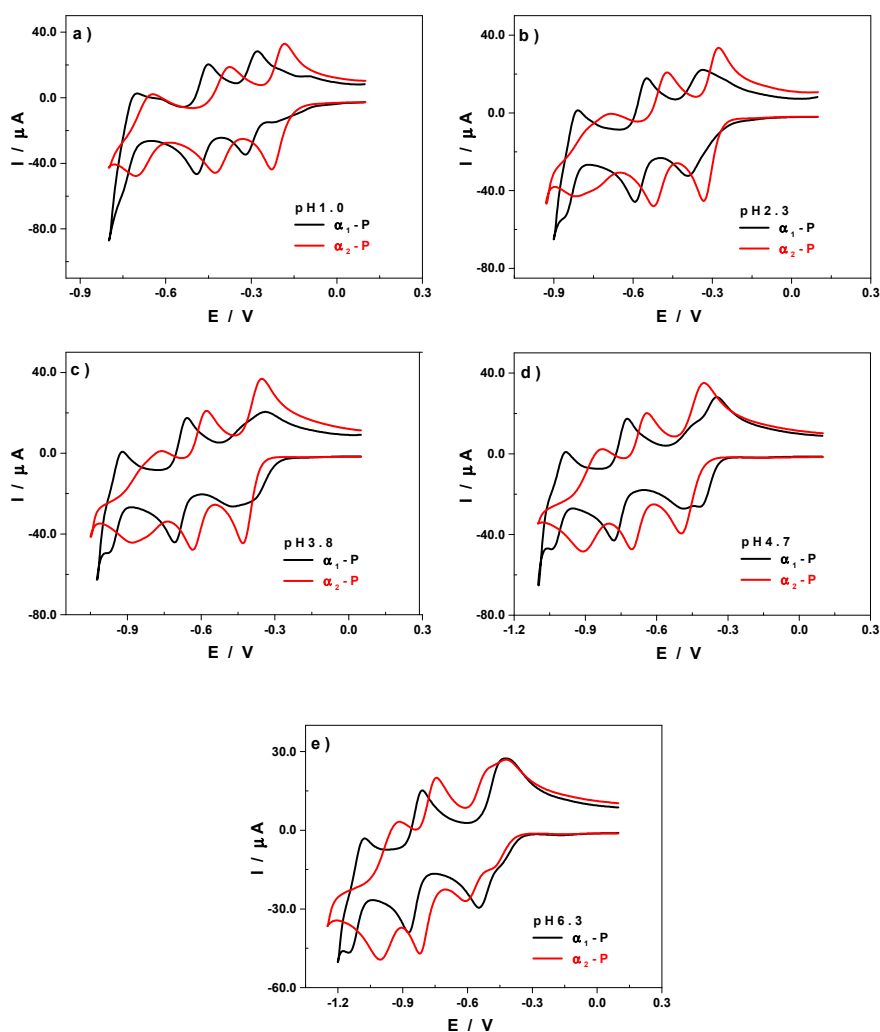

**Figure S4.** CVs of  $\alpha_1$ -P (black) and  $\alpha_2$ -P (red) in Britton-Robinson buffer. a) pH 1.0; b) pH 2.3; c) pH 3.8; d) pH 4.7; e) pH 6.3. Working electrode: GC; counter electrode: Pt; reference electrode: SCE. Scan rate: 10 mV s<sup>-1</sup>.

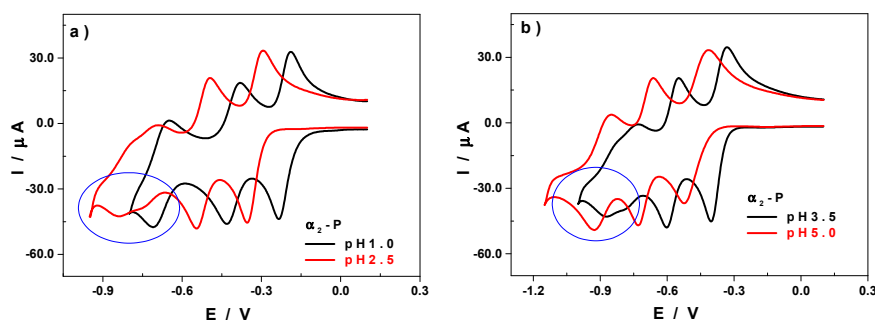

**Figure S5.** CVs of  $\alpha_2$ -P in Britton-Robinson buffer at a) pH 1.0 (black) and pH 2.5 (red); b) pH 3.5 (black) and pH 5.0 (red). Working electrode: GC; counter electrode: Pt; reference electrode: SCE. Scan rate: 10 mV s<sup>-1</sup>.

#### Law of variation of the reduction peak potential of the third wave as a function of the pH

- $W_3(\alpha_1) = -0.47 - 0.064 \text{ pH}$
- $W_3(\alpha_2) = -0.37 - 0.072 \text{ pH}$

#### S4 Electro-catalytic properties

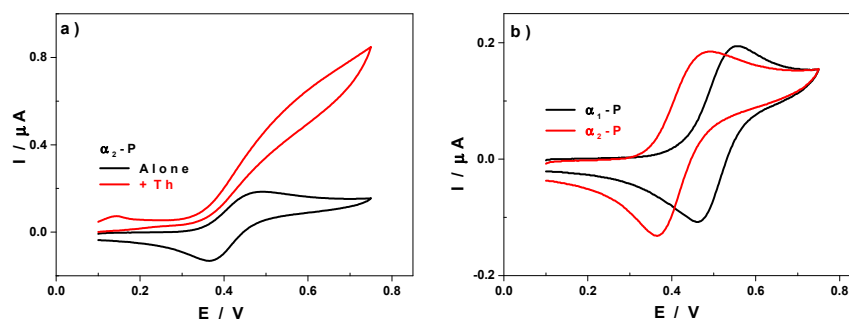

**Figure S6** a) CVs of  $\alpha_2$ -P alone (black) and in the presence of thiol (red); b) CVs of  $\alpha_1$ -P (black) and  $\alpha_2$ -P (red), both alone. Electrolyte: 0.2M Na<sub>2</sub>HPO<sub>4</sub> + H<sub>3</sub>PO<sub>4</sub> / pH 7.0. Working electrode: GC; counter electrode: Pt; reference electrode: SCE. Scan rate: 2 mV s<sup>-1</sup>.

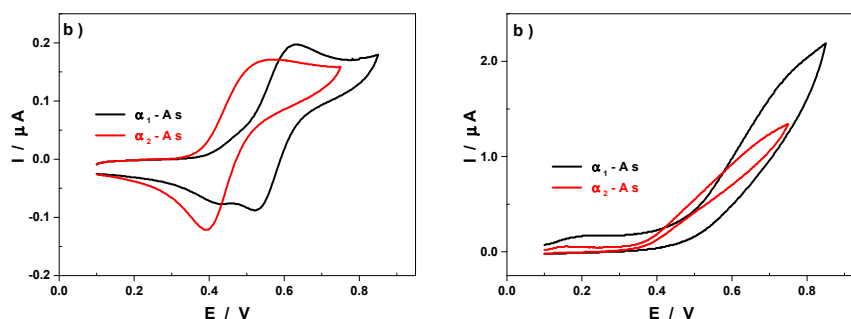

**Figure S7.** CVs of  $\alpha_1$ -As (black) and  $\alpha_2$ -As (red): a) alone and b) in presence of thiol. Electrolyte: 0.2M Na<sub>2</sub>HPO<sub>4</sub> + H<sub>3</sub>PO<sub>4</sub> / pH 7.0. Working electrode: GC; counter electrode: Pt; reference electrode: SCE. Scan rate: 2 mV s<sup>-1</sup>.

## S5 Magnetic properties

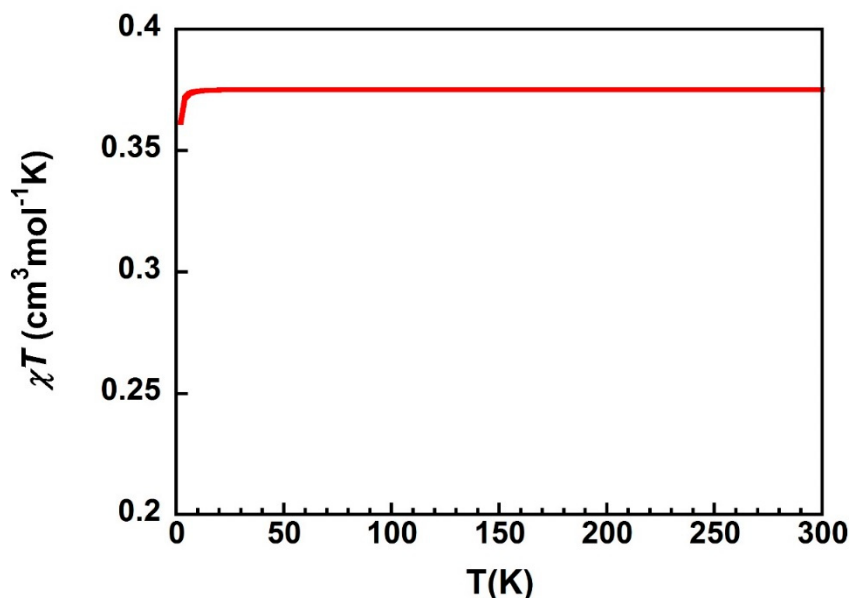

**Figure S8:** Theoretical susceptibility under an applied field of 1T in the form of a  $\chi_m T$  *vs* T plot for a  $S=1/2$  ion.

## S6. Syntheses of different POMs

### $\alpha_1$ -K<sub>8</sub>[As<sub>2</sub>V<sup>IV</sup>W<sub>17</sub>O<sub>62</sub>].18H<sub>2</sub>O (MW 4955.09)

A sample of VOSO<sub>4</sub>·5H<sub>2</sub>O (0.76 g; ~ 3.0 mmol) is dissolved in 90 mL of millipore water; the solution is acidified by the addition of hydrochloric acid (2 mL; 4M HCl); then  $\alpha_1$ -K<sub>10</sub>As<sub>2</sub>W<sub>17</sub>O<sub>61</sub>·19H<sub>2</sub>O (15.0 g; 3.0 mmol) is added in small portions with stirring. After 30 minutes of evolution at room temperature, the resulting black solution is filtered and treated with solid potassium chloride (10 g). The grey-black precipitate that formed is collected by filtration, washed with ethanol and dried in the open air. This material is re-crystallised in a minimum of acidified water (HCl solution of pH < 1). Mass obtained, m = 12.32 g; yield = 83%.g

### $\alpha_2$ -K<sub>8</sub>[As<sub>2</sub>V<sup>IV</sup>W<sub>17</sub>O<sub>62</sub>].18H<sub>2</sub>O (MW 4955.09)

The same method as described for the compound  $\alpha_1$ -K<sub>8</sub>[As<sub>2</sub>V<sup>IV</sup>W<sub>17</sub>O<sub>62</sub>].18H<sub>2</sub>O is used, this time starting from  $\alpha_2$ -K<sub>10</sub>As<sub>2</sub>W<sub>17</sub>O<sub>61</sub>·19H<sub>2</sub>O (15.0 g; 3.0 mmol). This material is re-crystallised in a minimum of acidified water (HCl solution of pH < 1). Mass obtained, m = 13.54 g; yield = 91 %.

### $\alpha_1$ -K<sub>8</sub>[P<sub>2</sub>V<sup>IV</sup>W<sub>17</sub>O<sub>62</sub>].18H<sub>2</sub>O (MW 4867.19)

The same method as described for the compound  $\alpha_1$ -K<sub>8</sub>[As<sub>2</sub>V<sup>IV</sup>W<sub>17</sub>O<sub>62</sub>].16H<sub>2</sub>O is used, this time starting from  $\alpha_1$ -K<sub>10</sub>P<sub>2</sub>W<sub>17</sub>O<sub>61</sub>·19H<sub>2</sub>O (15.0 g; 3.0 mmol). This material is re-crystallised in a minimum of acidified water (HCl solution of pH < 1). Mass obtained, m = 13.05 g; yield = 89 %.

### $\alpha_2$ -K<sub>8</sub>[P<sub>2</sub>V<sup>IV</sup>W<sub>17</sub>O<sub>62</sub>].16H<sub>2</sub>O (MW 4867.19)

The same method as described for the compound  $\alpha_1\text{-K}_8[\text{As}_2\text{V}^{\text{IV}}\text{W}_{17}\text{O}_{62}]\cdot 16\text{H}_2\text{O}$  is used, this time starting from  $\alpha_2\text{-K}_{10}\text{P}_2\text{W}_{17}\text{O}_{61}\cdot 19\text{H}_2\text{O}$  (15.0 g; 3.0 mmol). This material is re-crystallised in a minimum of acidified water (HCl solution of pH < 1). Mass obtained, m = 13.88 g; yield = 95 %.

**$\alpha_1\text{-K}_7[\text{As}_2\text{V}^{\text{V}}\text{W}_{17}\text{O}_{62}]\cdot 18\text{H}_2\text{O}$  (MW 4915.99)**

To a solution containing 6 mL of 0.5 M  $\text{NaVO}_3$  (3 mmol), 18 mL of molar HCl and 75 mL of millipore water, 15 g of  $\alpha_1\text{-K}_{10}\text{As}_2\text{W}_{17}\text{O}_{61}\cdot 19\text{H}_2\text{O}$  (3 mmol) is added. After 30 minutes of evolution at room temperature, the resulting intense yellow solution is filtered and treated with solid potassium chloride (10 g). The yellow precipitate that appears is collected by filtration, washed with ethanol and dried in the open air. This material is re-crystallised in a minimum of acidified water (HCl solution of pH < 1). Mass obtained, m = 12.02 g; yield = 81 %.

**$\alpha_2\text{-K}_7[\text{As}_2\text{V}^{\text{V}}\text{W}_{17}\text{O}_{62}]\cdot 18\text{H}_2\text{O}$  (MW 4915.99)**

The same method as described for the compound  $\alpha_1\text{-K}_7[\text{As}_2\text{V}^{\text{V}}\text{W}_{17}\text{O}_{62}]\cdot 18\text{H}_2\text{O}$  is used, this time starting from  $\alpha_2\text{-K}_{10}\text{As}_2\text{W}_{17}\text{O}_{61}\cdot 19\text{H}_2\text{O}$  (15.0 g; 3.0 mmol). This material is re-crystallised in a minimum of acidified water (HCl solution of pH < 1). Mass obtained, m = 12.50 g; yield = 85 %.

**$\alpha_1\text{-K}_7[\text{P}_2\text{V}^{\text{V}}\text{W}_{17}\text{O}_{62}]\cdot 18\text{H}_2\text{O}$  (MW 4828.10)**

The same method as described for the compound  $\alpha_1\text{-K}_7[\text{As}_2\text{V}^{\text{V}}\text{W}_{17}\text{O}_{62}]\cdot 18\text{H}_2\text{O}$  is used, this time starting from  $\alpha_1\text{-K}_{10}\text{P}_2\text{W}_{17}\text{O}_{61}\cdot 19\text{H}_2\text{O}$  (15.0 g; 3.0 mmol). This material is re-crystallised in a minimum of acidified water (HCl solution of pH < 1). Mass obtained, m = 13.25 g; yield = 92 %.

**$\alpha_2\text{-K}_7[\text{P}_2\text{V}^{\text{V}}\text{W}_{17}\text{O}_{62}]\cdot 18\text{H}_2\text{O}$  (MW 4828.10)**

The same method as described for the compound  $\alpha_1\text{-K}_7[\text{As}_2\text{V}^{\text{V}}\text{W}_{17}\text{O}_{62}]\cdot 18\text{H}_2\text{O}$  is used, this time starting from  $\alpha_2\text{-K}_{10}\text{P}_2\text{W}_{17}\text{O}_{61}\cdot 19\text{H}_2\text{O}$  (15.0 g; 3.0 mmol). This material is re-crystallised in a minimum of acidified water (HCl solution of pH < 1). Mass obtained, m = 13.70 g; yield = 95 %.
